# Supplementary material for: A Randomized Controlled Trial of Soy Isoflavone Intake on Mammographic Density among Malaysian Women
Source: MDPI journal article supplement (doi:10.3390/nu15020299), 2023-01-06
Supplement: s1 [file s1]

**Supplementary Table S1.** Comparison of characteristics between participants who completed and those who were lost in follow up

| Characteristics                                 | All<br>( <i>n</i> = 118) | Distribution by study completion |                                       | <i>p</i> Value |
|-------------------------------------------------|--------------------------|----------------------------------|---------------------------------------|----------------|
|                                                 |                          | Completed<br>( <i>n</i> = 91)    | Lost in follow up<br>( <i>n</i> = 27) |                |
| Demographic                                     |                          |                                  |                                       |                |
| Age in years, median (IQR)                      | 57 (6.8)                 | 57 (6.5)                         | 57 (6.5)                              | 0.785          |
| Ethnicity, <i>n</i> (%)                         |                          |                                  |                                       |                |
| Chinese                                         | 92 (78.0)                | 72 (79.1)                        | 20 (74.1)                             | 0.683          |
| Indian                                          | 16 (13.6)                | 11 (12.1)                        | 5 (18.5)                              |                |
| Malay                                           | 10 (8.5)                 | 8 (8.8)                          | 2 (7.4)                               |                |
| Education, <i>n</i> (%)                         |                          |                                  |                                       |                |
| Up to secondary                                 | 34 (28.8)                | 28 (30.8)                        | 6 (22.2)                              | 0.623          |
| Tertiary                                        | 81 (68.6)                | 62 (68.1)                        | 19 (70.4)                             |                |
| Monthly household income, <i>n</i> (%)          |                          |                                  |                                       |                |
| <RM5,000                                        | 42 (35.6)                | 33 (36.3)                        | 9 (33.3)                              | 0.999          |
| RM5,000 – 10,000                                | 38 (32.2)                | 29 (31.9)                        | 9 (33.3)                              |                |
| > RM10,000                                      | 33 (28.0)                | 26 (28.6)                        | 7 (25.9)                              |                |
| Reproductive                                    |                          |                                  |                                       |                |
| No. of children, <i>n</i> (%)                   |                          |                                  |                                       |                |
| None                                            | 24 (20.3)                | 17 (18.7)                        | 7 (25.9)                              | 0.612          |
| 1-2                                             | 52 (44.1)                | 41 (45.1)                        | 11 (40.7)                             |                |
| > 3                                             | 39 (33.1)                | 32 (35.2)                        | 7 (25.9)                              |                |
| Age at last menstrual period, median (IQR)      | 51.0 (6.0)               | 51.0 (5.2)                       | 50.5 (5.8)                            | 0.138          |
| Years since last menstrual period, <i>n</i> (%) |                          |                                  |                                       |                |
| Less than 5 years                               | 51 (43.2)                | 38 (41.8)                        | 13 (48.1)                             | 0.654          |
| 5 years or more                                 | 63 (53.4)                | 50 (54.9)                        | 13 (48.1)                             |                |
| Use of oral contraceptives, <i>n</i> (%)        | 34 (28.8)                | 29 (31.9)                        | 5 (18.5)                              | 0.323          |
| Family history & screening                      |                          |                                  |                                       |                |
| 1° Family history, <i>n</i> (%)                 |                          |                                  |                                       |                |
| Any cancer                                      | 53 (44.9)                | 42 (46.2)                        | 11 (40.7)                             | 0.665          |
| Breast cancer                                   | 15 (12.7)                | 11 (12.1)                        | 4 (14.8)                              | 0.746          |

|                                                 |             |             |             |       |
|-------------------------------------------------|-------------|-------------|-------------|-------|
| Last mammogram, <i>n</i> (%)                    |             |             |             |       |
| 1-2 years                                       | 34 (28.8)   | 28 (30.8)   | 6 (22.2)    | 0.781 |
| More than 2 years                               | 79 (66.9)   | 59 (64.8)   | 20 (74.1)   |       |
| Never                                           | 5 (4.2)     | 4 (4.4)     | 1 (3.7)     |       |
| Lifestyle factors at enrolment                  |             |             |             |       |
| BMI, kg/m <sup>2</sup> , <i>n</i> (%)           |             |             |             |       |
| < 25 (low)                                      | 73 (61.9)   | 53 (58.2)   | 20 (74.1)   | 0.177 |
| ≥ 25 (high)                                     | 45 (38.1)   | 38 (41.8)   | 7 (25.9)    |       |
| Physical activity, MET-hours/week, <i>n</i> (%) |             |             |             |       |
| ≤ 10 (low)                                      | 59 (50.0)   | 46 (50.5)   | 13 (48.1)   | 0.999 |
| > 10 (moderate/high)                            | 55 (46.6)   | 42 (46.2)   | 13 (48.1)   |       |
| Soy isoflavone intake, mg/day, median (IQR)     | 17.8 (21.2) | 17.8 (22.9) | 16.9 (21.6) | 0.096 |
| Mammographic density at enrolment, median (IQR) |             |             |             |       |
| Dense area, cm <sup>2</sup>                     | 15.1 (20.3) | 14.6 (18.5) | 19.2 (22.5) | 0.066 |
| Percent density, %                              | 13.3 (22.7) | 12.7 (21.8) | 21.0 (19.9) | 0.033 |

**Supplementary Table S2.** Change in area-based percent mammographic density over the study period ( $n = 90$ )

|                            |          | Change in percent mammographic density, median (IQR) |                |                     |                |
|----------------------------|----------|------------------------------------------------------|----------------|---------------------|----------------|
|                            | <i>n</i> | Absolute change (%)                                  | <i>p</i> Value | Relative change (%) | <i>p</i> Value |
| By study arm               |          |                                                      |                |                     |                |
| All completed participants |          |                                                      |                |                     |                |
| ISF Supplement             | 27       | -1.4 (6.4)                                           | 0.347          | -13.9 (45.9)        | 0.999          |
| ISF Diet                   | 30       | -0.5 (3.6)                                           |                | -11.8 (45.6)        |                |
| Control                    | 33       | -1.1 (5.4)                                           |                | -16.4 (53.8)        |                |
| < 5 years since menopause  |          |                                                      |                |                     |                |
| ISF Supplement             | 10       | -4.4 (7.1)                                           | 0.061          | -22.8 (30.1)        | 0.227          |
| ISF Diet                   | 14       | -0.7 (3.7)                                           |                | -15.2 (44.4)        |                |
| Control                    | 13       | -0.8 (6.5)                                           |                | -14.4 (37.7)        |                |
| ≥ 5 years since menopause  |          |                                                      |                |                     |                |
| ISF Supplement             | 16       | -0.4 (3.5)                                           | 0.307          | -9.1 (41.1)         | 0.660          |
| ISF Diet                   | 15       | -0.3 (3.1)                                           |                | -11.5 (44.8)        |                |
| Control                    | 19       | -1.5 (4.2)                                           |                | -27.7 (51.3)        |                |
| By total isoflavone intake |          |                                                      |                |                     |                |
| All completed participants |          |                                                      |                |                     |                |
| <18mg/day                  | 23       | -0.8 (4.2)                                           | 0.441          | -20.2 (60.4)        | 0.615          |
| 18-61mg/day                | 22       | -2.0 (6.2)                                           |                | -14.8 (57.5)        |                |
| 61-101mg/day               | 21       | -1.3 (2.9)                                           |                | -11.6 (32.5)        |                |
| >101mg/day                 | 24       | -0.2 (6.7)                                           |                | -10.4 (54.5)        |                |
| < 5 years since menopause  |          |                                                      |                |                     |                |
| <18mg/day                  | 11       | -0.8 (5.8)                                           | 0.411          | -13.9 (36.1)        | 0.285          |
| 18-61mg/day                | 9        | -3.3 (9.2)                                           |                | -10.2 (46.9)        |                |
| 61-101mg/day               | 8        | -1.2 (4.4)                                           |                | -21.2 (33.2)        |                |
| >101mg/day                 | 9        | -3.5 (8.9)                                           |                | -18.3 (25.4)        |                |
| ≥ 5 years since menopause  |          |                                                      |                |                     |                |
| <18mg/day                  | 11       | -1.1 (2.1)                                           | 0.100          | -36.9 (45.1)        | 0.282          |
| 18-61mg/day                | 12       | -1.9 (4.6)                                           |                | -20.8 (52.7)        |                |
| 61-101mg/day               | 13       | -1.3 (2.1)                                           |                | -11.5 (36.5)        |                |
| >101mg/day                 | 14       | 1.1 (3.5)                                            |                | 7.3 (46.5)          |                |

**Supplementary Table S3.** Change in dense volume over the study period ( $n = 90$ )

|                            |          | Change in dense volume, median (IQR)  |                |                        |                   |
|----------------------------|----------|---------------------------------------|----------------|------------------------|-------------------|
|                            | <i>n</i> | Absolute change<br>(cm <sup>3</sup> ) | <i>p</i> Value | Relative<br>change (%) | <i>p</i><br>Value |
| By study arm               |          |                                       |                |                        |                   |
| All completed participants |          |                                       |                |                        |                   |
| ISF Supplement             | 24       | -0.9 (6.8)                            | 0.550          | -1.3 (19.4)            | 0.544             |
| ISF Diet                   | 29       | -2.0 (8.1)                            |                | -4.2 (16.3)            |                   |
| Control                    | 32       | -1.8 (10.4)                           |                | -5.5 (22.9)            |                   |
| < 5 years since menopause  |          |                                       |                |                        |                   |
| ISF Supplement             | 10       | -0.9 (6.3)                            | 0.328          | -2.4 (12.6)            | 0.328             |
| ISF Diet                   | 14       | -3.7 (7.4)                            |                | -9.4 (11.5)            |                   |
| Control                    | 13       | 0.3 (9.5)                             |                | 0.5 (21.9)             |                   |
| ≥ 5 years since menopause  |          |                                       |                |                        |                   |
| ISF Supplement             | 16       | 0.3 (7.3)                             | 0.503          | 0.4 (20.5)             | 0.380             |
| ISF Diet                   | 15       | 0.2 (6.8)                             |                | 0.3 (16.9)             |                   |
| Control                    | 19       | -1.9 (9.2)                            |                | -6.4 (17.8)            |                   |
| By total isoflavone intake |          |                                       |                |                        |                   |
| All completed participants |          |                                       |                |                        |                   |
| <18mg/day                  | 22       | 0.2 (7.0)                             | 0.671          | 0.4 (15.7)             | 0.535             |
| 18-61mg/day                | 21       | -1.9 (13.2)                           |                | -5.1 (26.7)            |                   |
| 61-101mg/day               | 20       | 0.6 (8.8)                             |                | 0.6 (22.2)             |                   |
| >101mg/day                 | 22       | -2.2 (4.9)                            |                | -4.9 (12.6)            |                   |
| < 5 years since menopause  |          |                                       |                |                        |                   |
| <18mg/day                  | 11       | -2.8 (6.8)                            | 0.390          | -7.4 (15.8)            | 0.373             |
| 18-61mg/day                | 9        | 0.8 (12.0)                            |                | 2.5 (23.0)             |                   |
| 61-101mg/day               | 8        | -3.1 (6.0)                            |                | -8.3 (10.9)            |                   |
| >101mg/day                 | 9        | -2.9 (23.9)                           |                | -6.6 (24.7)            |                   |
| ≥ 5 years since menopause  |          |                                       |                |                        |                   |
| <18mg/day                  | 11       | 1.3 (5.3)                             | 0.192          | 2.5 (11.2)             | 0.177             |
| 18-61mg/day                | 12       | -4.0 (8.4)                            |                | -9.9 (13.4)            |                   |
| 61-101mg/day               | 13       | 2.2 (10.4)                            |                | 7.7 (25.8)             |                   |
| >101mg/day                 | 14       | -2.3 (3.9)                            |                | -5.5 (8.8)             |                   |

**Supplementary Table S4.** Distribution of total soy isoflavone intake at Month 12 by study arm

| Total soy isoflavone intake<br>(mg/day) | <i>n</i> | Distribution by study arm, <i>n</i> (%) |                              |                             |
|-----------------------------------------|----------|-----------------------------------------|------------------------------|-----------------------------|
|                                         |          | ISF<br>Supplements<br>( <i>n</i> = 27)  | ISF Diet<br>( <i>n</i> = 30) | Control<br>( <i>n</i> = 33) |
| <18mg/day                               | 23       | 4 (14.8)                                | 3 (10.0)                     | 16 (48.5)                   |
| 18-61mg/day                             | 22       | 4 (14.8)                                | 4 (13.3)                     | 14 (42.4)                   |
| 61-101mg/day                            | 21       | 4 (14.8)                                | 14 (46.7)                    | 3 (9.1)                     |
| >101mg/day                              | 24       | 15 (55.6)                               | 9 (30.0)                     | 0 (0)                       |

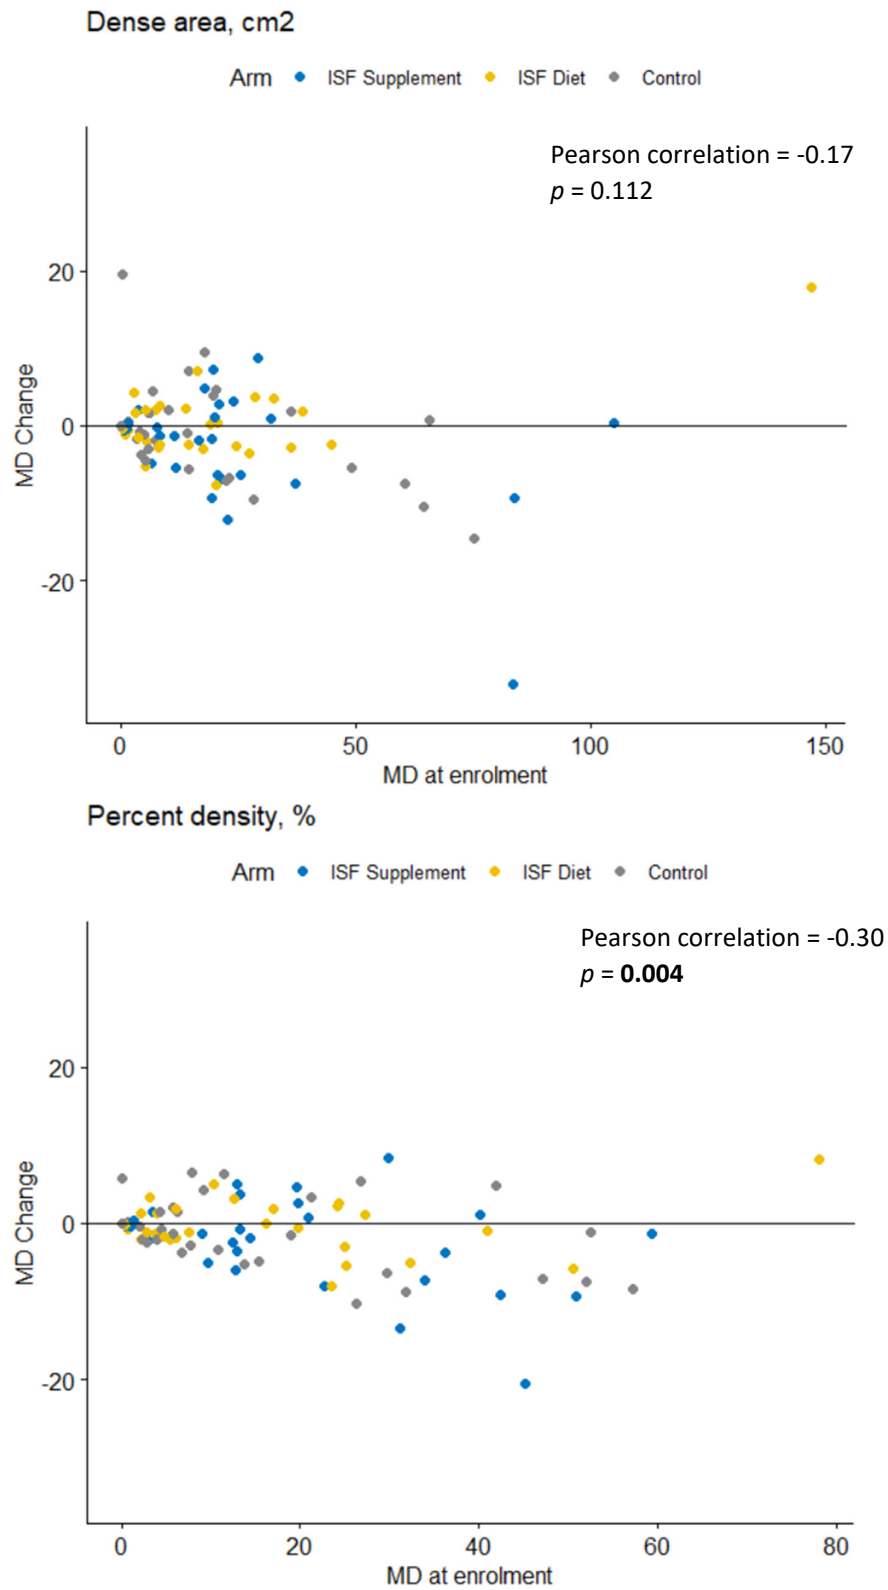

**Supplementary Figure S1** Distribution of MD change by MD at enrolment for dense area and percent density
